# Supplementary material
Source: PubMed Central journal article supplement (PMC3558985)
Supplement: NIHMS438179-supplement-01.pdf [file NIHMS438179-supplement-01.pdf]

**Supplementary Figure 1.** Representative immunohistochemical staining for CD11c expression in granulomas from various diseases and tissues (magnification 400×).

Supplemental Figure 1.

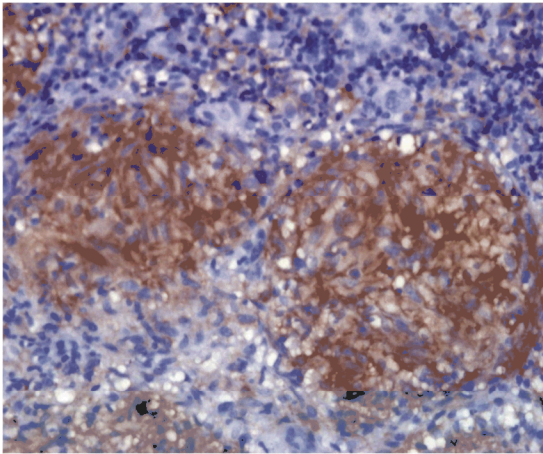

Esophageal tuberculosis

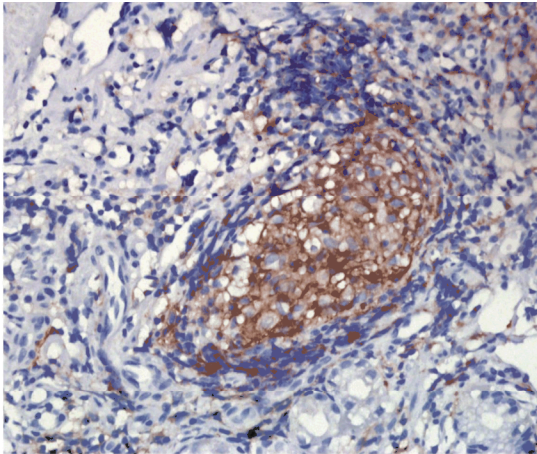

Stomach sarcoidosis

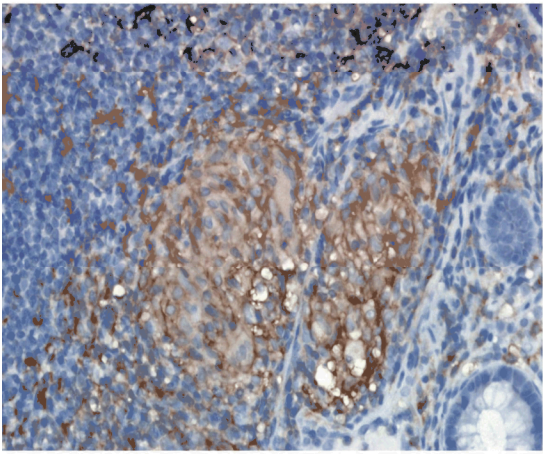

Crohn disease

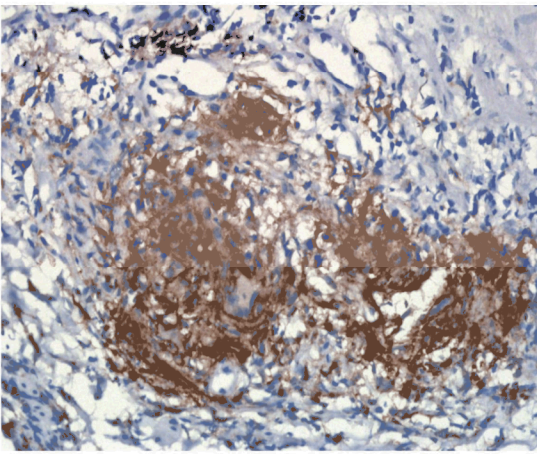

Granulomatous gastritis

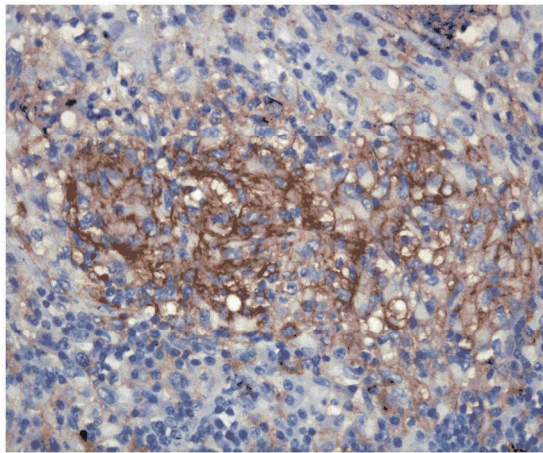

Groin granuloma

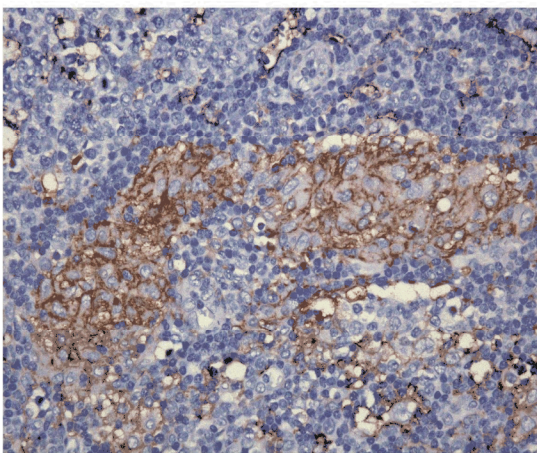

Epidermal cyst
